# Supplementary material
Source: publisher figshare collection journal article supplement (https://acs.figshare.com/ndownloader/files/4558645)
Supplement: Supplementary file 1 [file 4558645]

# Solution Structure and Thermodynamics of 2',5' RNA Intercalation

*Eric D. Horowitz<sup>1</sup>, Seth Lilavivat<sup>1</sup>, Benjamin W. Holladay<sup>1</sup>,  
Markus W. Germann<sup>2</sup>, and Nicholas V. Hud<sup>1</sup>*

<sup>1</sup>Parker H. Petit Institute of Bioengineering and Bioscience, Georgia Institute of Technology, School of Chemistry and Biochemistry, Atlanta, GA, USA 30332-0400

<sup>2</sup>Georgia State University, Departments of Chemistry and Biology, Atlanta, GA, USA 30302-4098

## *Supporting Information*

### 2',5' RNA <sup>1</sup>H Assignments

|           | H6/H8 | H5        | H1'  | H2'  | H3'  | H4'  | H5'/5''   | imino     |
|-----------|-------|-----------|------|------|------|------|-----------|-----------|
| <b>G1</b> | 7.89  | <i>na</i> | 5.89 | 4.98 | 4.42 | 4.15 | 3.70/2.75 | 11.87     |
| <b>C2</b> | 7.44  | 5.67      | 5.72 | 4.15 | 4.16 | 3.49 | 3.91/3.85 | <i>na</i> |
| <b>C3</b> | 7.48  | 5.48      | 6.02 | 4.70 | 4.47 | 4.25 | 4.05      | <i>na</i> |
| <b>G4</b> | 7.45  | <i>na</i> | 5.68 | 4.64 | 4.72 | 4.19 | --        | 11.30     |
| <b>C5</b> | 7.09  | 4.70      | 5.88 | 4.48 | 4.45 | 4.30 | 4.11      | <i>na</i> |
| <b>G6</b> | 7.39  | <i>na</i> | 5.71 | 4.70 | 4.18 | 4.16 | --        | 11.22     |
| <b>G7</b> | 7.11  | <i>na</i> | 5.73 | 4.48 | 4.16 | 4.27 | 4.14      | 12.72     |
| <b>C8</b> | 7.20  | 5.20      | 5.56 | 3.90 | 3.85 | 3.99 | 4.08/3.87 | <i>na</i> |

### 2',5' RNA <sup>31</sup>P Assignments

| G1pC2         | C2pC3         | C3pG4        | G4pC5         | C5pG6        | G6pG7         | G7pC8        |
|---------------|---------------|--------------|---------------|--------------|---------------|--------------|
| -0.81 (-0.86) | -0.25 (-0.10) | 0.87 (-0.18) | -1.23 (-0.61) | 0.68 (-0.16) | -0.51 (-0.75) | -0.57 (0.15) |

### Proflavine <sup>1</sup>H Assignments

| H1/H8 | H2/H7 | H4/H5 | H9   |
|-------|-------|-------|------|
| 6.08  | 6.62  | 5.97  | 7.62 |

All assignments are for the proflavine-RNA complex at 282 K. Values given in parentheses for <sup>31</sup>P assignments are for the unintercalated duplex.

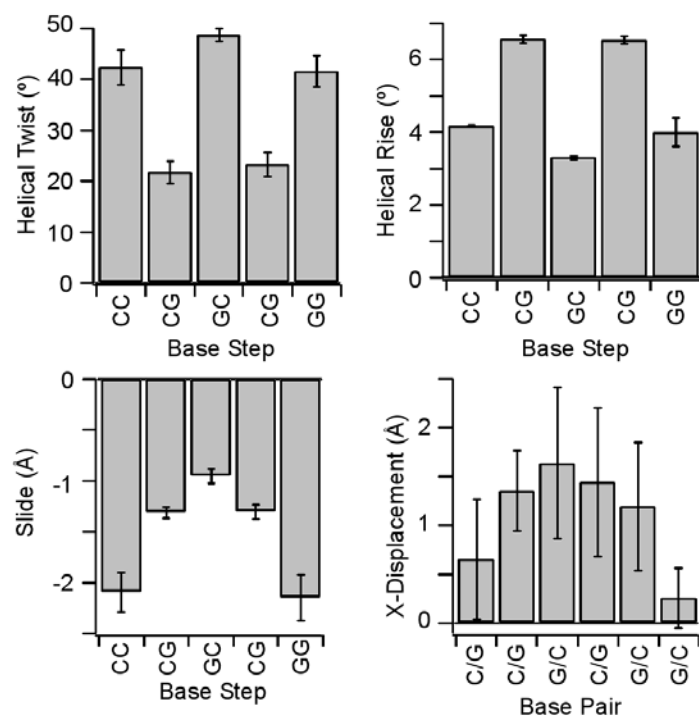

**Figure S1.** Bar graphs of average helical parameters for the 10 lowest energy structures of the 2',5' RNA duplex (GCCGCGGC)<sub>2</sub> with proflavine bound at the two CpG steps. Only the central five out of the seven base steps are shown. Error bars indicate standard deviations.

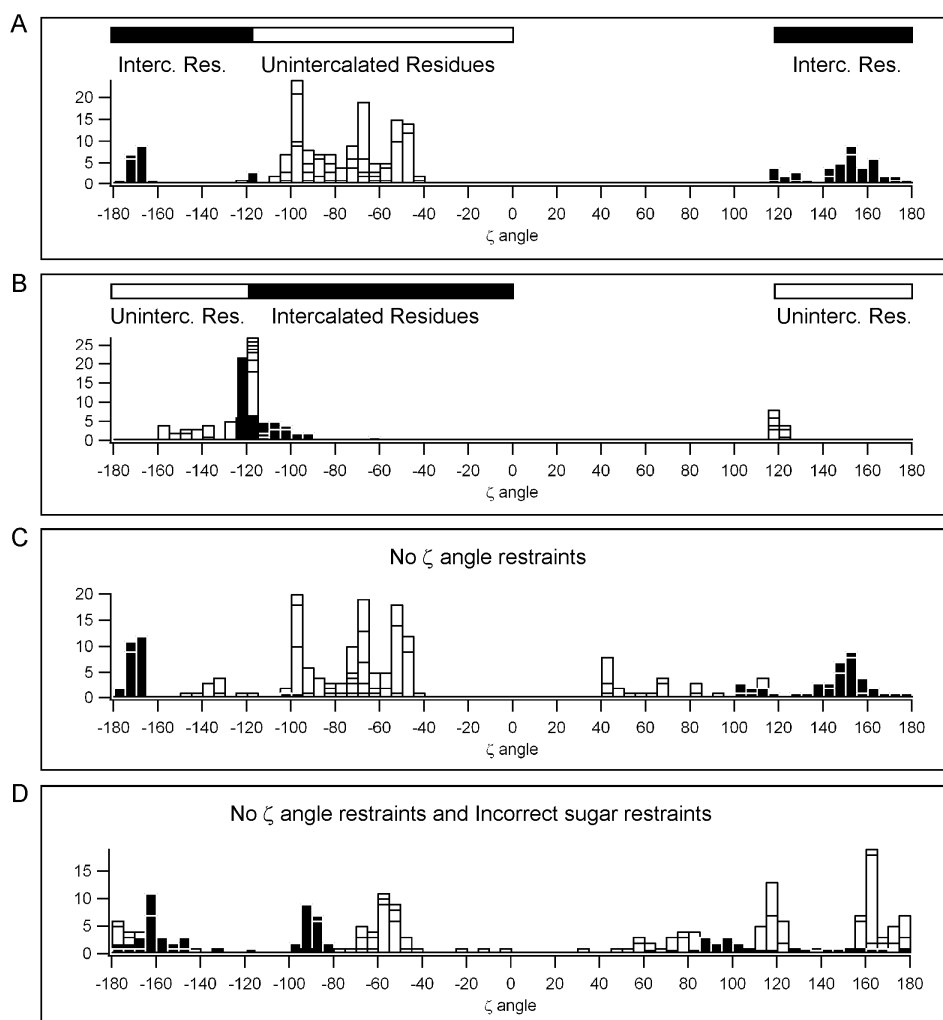

**Figure S2.** Zeta angles compiled from the 30 lowest energy structures after the second annealing refinement. Intercalated residue restraints correspond to  $\zeta$  angles on the C3pG4 and C5pG6 phosphates. Unintercalated residue restraints correspond to all other  $\zeta$  angles. A)  $\zeta$  angles defined by what has been previously observed for 3',5'-linked nucleic acids. B)  $\zeta$  angles opposite of what was previously observed for 3',5'-linked nucleic acids. C) No  $\zeta$  angle restraints. D) No  $\zeta$  angle restraints and the opposite sugar pucker restraints with respect to what is observed by NMR spectroscopy.

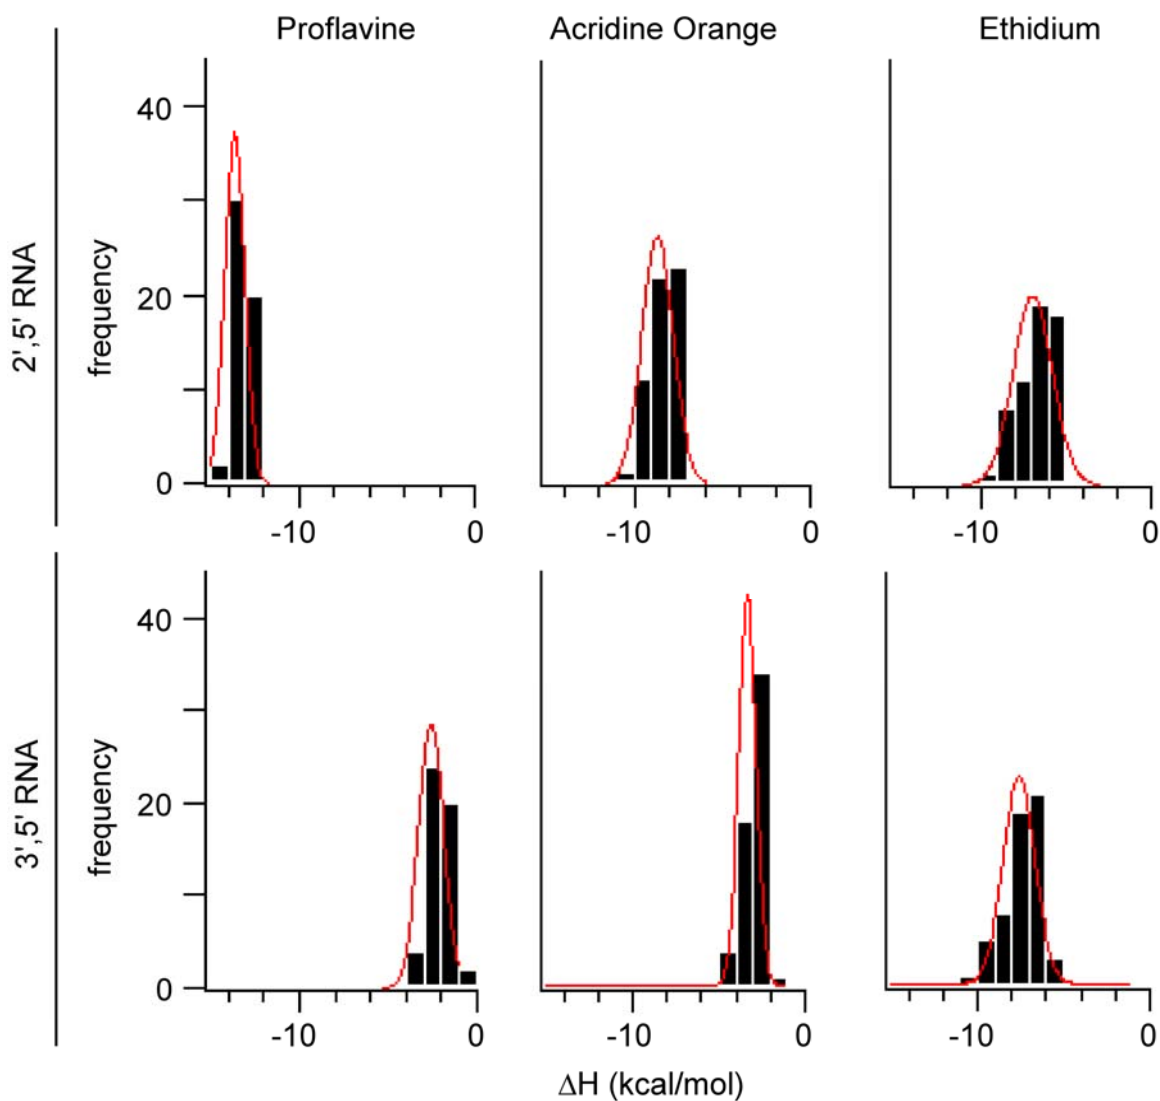

**Figure S3.** Histograms showing the enthalpy distributions obtained from model-free ITC.

|                 | $\Delta G_{2',5'}$ | $\Delta G_{3',5'}$ | $\Delta H_{2',5'}$ | $\Delta H_{3',5'}$ | $-T\Delta S_{2',5'}$ | $-T\Delta S_{3',5'}$ |
|-----------------|--------------------|--------------------|--------------------|--------------------|----------------------|----------------------|
| Proflavine      | -7.8               | -5.9               | -13.6              | -2.6               | +5.8                 | -3.3                 |
| Acridine orange | -6.4               | -5.3               | -8.7               | -3.4               | +2.3                 | -1.9                 |
| Ethidium        | -6.0               | -6.4               | -6.9               | -7.6               | +0.9                 | +1.2                 |

**Figure S4.** Enthalpy ( $\Delta H$ ) and entropy ( $-T\Delta S$ ) values for the intercalation of 2',5' RNA and 3',5' RNA with proflavine, acridine orange, and ethidium at 25 °C. Data shown are in kcal/mol.

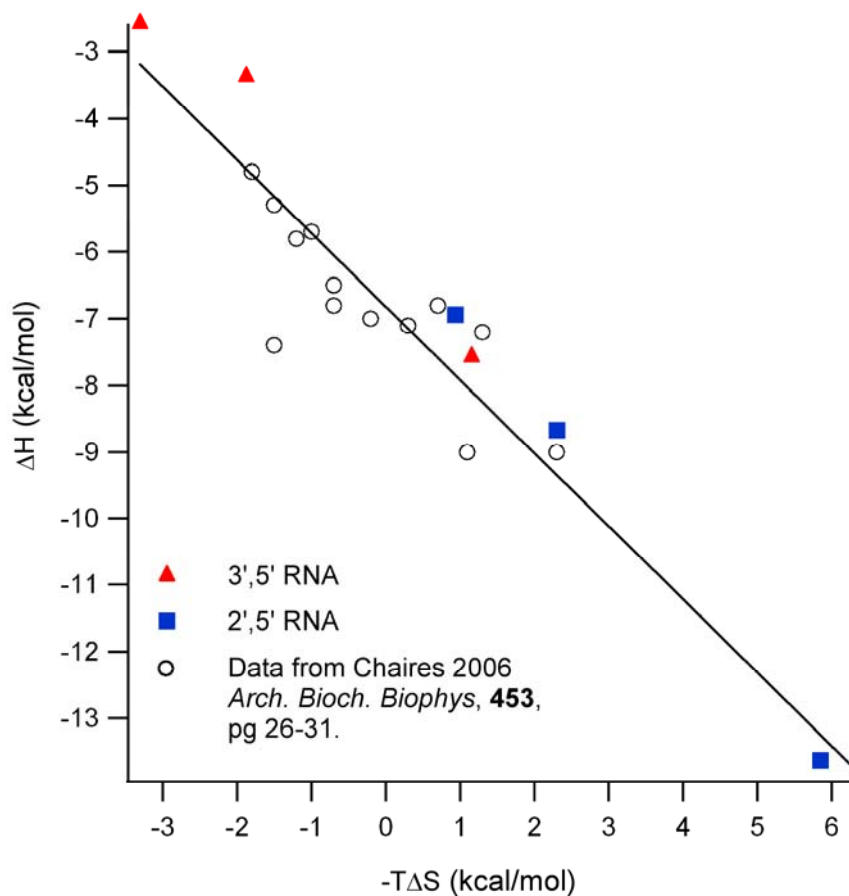

**Figure S5.** The linear relationship between enthalpy and entropy for intercalators binding to nucleic acids. The compilation of data reproduced from the work of Chaires<sup>1</sup> shows the linear relationship for intercalators binding to DNA. The same trend is observed for 3',5' RNA as well as 2',5' RNA.

- (1) Chaires, J. B., A thermodynamic signature for drug-DNA binding mode. *Arch. Biochem. Biophys.* **2006**, 453, 26-31.
